# Supplementary material for: Study on the Characteristics of Small-Molecule Kinase Inhibitors-Related Drug-Induced Liver Injury
Source: Front Pharmacol. 2022 Apr 21;13:838397. doi: 10.3389/fphar.2022.838397 (PMC9068902; doi:10.3389/fphar.2022.838397)
Supplement: Supplementary file 2 [file Table1.xlsx]

## Sheet: Supplementary Table 1
Supplementary Table 6. The specific possible reasons for the unavailability of information of KIs.
Number	Drug name	Reason
1	cediranib	The phase I study experiment was withdrawn before registration.
2	icotinib	Approved only in China.
3	masitinib	The drug has been on the market in Europe since the second half of 2009.
4	olmutinib	Under study, approval information is not available.
5	ridaforolimus	It was officially rejected by FDA in June 2012
6	rociletinib	In May 2016, the research work of rociletinib was stopped and the application for listing license was withdrawn.
7	tivozanib	2017.8 MBA approval.
8	quizartinib	As of 2017, the drug was still in clinical trials.
	* Information from FDA website: https://www.fda.gov/.

## Sheet: Supplementary Table 2
Supplementary Table 1. All drugs in our study.
Name
abacavir
abiraterone
acamprosate
acarbose
acebutolol
aceclofenac
acemetacin
acenocoumarol
acetazolamide
acetohexamide
acetohydroxamic acid
acetophenazine
acetylcysteine
acetyldigoxin
acetylsalicylic acid
aciclovir
acipimox
acitretin
acrivastine
adefovir dipivoxil
agomelatine
ajmaline
albendazole
alclofenac
alfacalcidol
alfuzosin
alimemazine
aliskiren
alitretinoin
alizapride
allopurinol
almitrine
almotriptan
alosetron
alprazolam
alprenolol
amantadine
ambenonium
ambrisentan
ambroxol
amezinium metilsulfate
amfepramone
amfetamine
amifampridine
amiloride
aminocaproic acid
aminoglutethimide
amiodarone
amisulpride
amitriptyline
amlodipine
amobarbital
amoxapine
amoxicillin
amphotericin b
ampicillin
amprenavir
anastrozole
antazoline
apixaban
aprepitant
aprindine
aprobarbital
aripiprazole
artemether
artesunate
ascorbic acid (vit c)
asenapine
astemizole
atazanavir
atenolol
atomoxetine
atorvastatin
atovaquone
atropine
auranofin
azapropazone
azatadine
azathioprine
azelastine
azithromycin
bacampicillin
baclofen
balsalazide
bambuterol
bazedoxifene
benazepril
bendroflumethiazide
benfluorex
benorilate
benperidol
benzatropine
benzbromarone
benznidazole
benzonatate
bepridil
betacarotene
betahistine
betaine
betamethasone
betaxolol
bethanechol
bevantolol
bezafibrate
bicalutamide
biperiden
bisacodyl
bismuth subcitrate
bisoprolol
boceprevir
bosentan
brivudine
brodimoprim
bromazepam
bromhexine
bromocriptine
bromopride
bromperidol
brompheniramine
brotizolam
buclizine
budesonide
buflomedil
bumetanide
buphenine
bupropion
buspirone
butylscopolamine
cabergoline
cadralazine
caffeine
calcitriol
calcium carbonate
calcium folinate
captopril
carbachol
carbamazepine
carbenoxolone
carbimazole
carbinoxamine
carglumic acid
carisoprodol
carteolol
carvedilol
castor oil
cefaclor
cefadroxil
cefalexin
cefdinir
cefixime
cefotiam
cefprozil
cefradine
ceftibuten
cefuroxime
celecoxib
celiprolol
cerivastatin
cetirizine
cevimeline
chloral hydrate
chloramphenicol
chlordiazepoxide
chlorhexidine
chlormezanone
chloroquine
chlorothiazide
chlorotrianisene
chlorphenamine
chlorphenoxamine
chlorpromazine
chlorpropamide
chlorprothixene
chlortalidone
chlortetracycline
chlorzoxazone
ciclosporin
cilazapril
cilnidipine
cilostazol
cimetidine
cinacalcet
cinnarizine
cinoxacin
ciprofibrate
ciprofloxacin
cisapride
citalopram
clarithromycin
clemastine
clindamycin
clobazam
clobutinol
clodronic acid
clofazimine
clofibrate
clomethiazole
clomifene
clomipramine
clonazepam
clonidine
clopamide
cloperastine
clopidogrel
clotiapine
cloxacillin
clozapine
codeine
colchicine
colesevelam
colestipol
colestyramine
conjugated estrogens
cortisone
cromoglicic acid
cyanocobalamin
cyclandelate
cyclizine
cyclofenil
cycloserine
cyclothiazide
cyproheptadine
cyproterone
dabigatran etexilate
danazol
dantrolene
dapsone
darifenacin
darunavir
deflazacort
delapril
delavirdine
demeclocycline
desipramine
desloratadine
desmopressin
desvenlafaxine
dexamethasone
dexamfetamine
dexchlorpheniramine
dexfenfluramine
dexibuprofen
dexketoprofen
dextromethorphan
dextropropoxyphene
dextrothyroxine
diazepam
dibenzepin
diclofenac
diclofenamide
dicloxacillin
dicoumarol
dicycloverine
didanosine
dienestrol
diethylcarbamazine
diethylstilbestrol
diflunisal
digitoxin
digoxin
dihydralazine
dihydrocodeine
dihydroergotamine
dihydrotachysterol
diloxanide
diltiazem
dimetindene
dinoprostone
diphenhydramine
diphenoxylate
diprophylline
dipyridamole
dirithromycin
disopyramide
distigmine
disulfiram
dixyrazine
docusate sodium
dolasetron
domperidone
donepezil
dosulepin
doxazosin
doxepin
doxycycline
dronedarone
drotaverine
duloxetine
dutasteride
ebastine
efavirenz
eletriptan
eltrombopag
emepronium
emtricitabine
enalapril
encainide
enoxacin
enprostil
entacapone
entecavir
ephedrine
eplerenone
eprosartan
erdosteine
ergoloid mesylates
ergometrine
ergotamine
eritrityl tetranitrate
erythromycin
escitalopram
eslicarbazepine
esomeprazole
estazolam
estradiol
etacrynic acid
ethambutol
ethchlorvynol
ethionamide
ethosuximide
ethotoin
etilefrine
etodolac
etoricoxib
etravirine
etretinate
everolimus
exemestane
ezetimibe
famciclovir
famotidine
fampridine
febuxostat
felbamate
felodipine
fenbufen
fenfluramine
fenofibrate
fenoprofen
fenoterol
fesoterodine
fexofenadine
fidaxomicin
finasteride
fingolimod
flavoxate
flecainide
fleroxacin
floctafenine
flucloxacillin
fluconazole
flucytosine
fludrocortisone
flufenamic acid
flumequine
flunarizine
flunitrazepam
fluocortolone
fluoxetine
fluoxymesterone
flupentixol
fluphenazine
flupirtine
flurazepam
flurbiprofen
flutamide
fluvastatin
fluvoxamine
folic acid
fosamprenavir
fosfomycin
fosinopril
frovatriptan
furosemide
fusidic acid
gabapentin
galantamine
ganciclovir
gatifloxacin
gemfibrozil
glibenclamide
gliclazide
glimepiride
glipizide
gliquidone
glucosamine
glutamic acid hydrochloride
glutethimide
glyceryl trinitrate
glycopyrronium bromide
granisetron
grepafloxacin
griseofulvin
guaifenesin
guanethidine
guanfacine
halazepam
halofantrine
haloperidol
hexoprenaline
hydralazine
hydrochlorothiazide
hydrocodone
hydrocortisone
hydroflumethiazide
hydromorphone
hydroxychloroquine
hydroxyzine
hyoscyamine
ibandronic acid
ibopamine
ibuprofen
imidapril
imipramine
indapamide
indinavir
indometacin
inosine pranobex
irbesartan
isocarboxazid
isoetarine
isoniazid
isoprenaline
isopropamide
isosorbide dinitrate
isosorbide mononitrate
isotretinoin
isoxsuprine
isradipine
itraconazole
ivabradine
ivermectin
josamycin
ketanserin
ketobemidone
ketoconazole
ketoprofen
ketorolac
ketotifen
labetalol
lacidipine
lacosamide
lactitol
lactulose
lamivudine
lamotrigine
lansoprazole
lanthanum carbonate
leflunomide
lenalidomide
lentinan
lercanidipine
letrozole
levamisole
levetiracetam
levocarnitine
levocetirizine
levodopa
levodropropizine
levofloxacin
levomepromazine
levonorgestrel
levosulpiride
levothyroxine sodium
linagliptin
lincomycin
linezolid
liothyronine sodium
lisdexamfetamine
lisinopril
lisuride
lofepramine
lofexidine
loperamide
loprazolam
loracarbef
loratadine
lorazepam
lormetazepam
lornoxicam
losartan
lovastatin
loxapine
lumiracoxib
macrogol
magnesium carbonate
manidipine
maprotiline
maraviroc
mazindol
mebendazole
mebeverine
meclozine
medazepam
medroxyprogesterone
mefenamic acid
mefloquine
megestrol
melatonin
melitracen
meloxicam
melperone
memantine
mepacrine
mepenzolate
mephenytoin
mepindolol
meprobamate
meptazinol
mepyramine
mesalazine
mesoridazine
mesuximide
metacycline
metamfetamine
metformin
methadone
methantheline
methaqualone
methazolamide
methdilazine
methenamine
methocarbamol
methotrexate
methoxsalen
methyclothiazide
methyldopa (levorotatory)
methyldopa (racemic)
methylergometrine
methylphenidate
methylphenobarbital
methylprednisolone
methyltestosterone
methysergide
metildigoxin
metoclopramide
metolazone
metoprolol
metrifonate
metronidazole
mexiletine
mianserin
mibefradil
midazolam
midodrine
mifepristone
miglitol
miglustat
milnacipran
minocycline
minoxidil
miocamycin
mirtazapine
misoprostol
mizolastine
moclobemide
modafinil
moexipril
molindone
montelukast
moracizine
morphine
moxifloxacin
moxonidine
mycophenolic acid
nabumetone
nadolol
naftidrofuryl
nalidixic acid
naltrexone
naproxen
naratriptan
natamycin
nateglinide
nebivolol
nefazodone
nelfinavir
neomycin
neostigmine
netilmicin
nevirapine
nicardipine
niclosamide
nicorandil
nicotinamide
nicotinic acid
nifedipine
niflumic acid
nifurtimox
nilutamide
nilvadipine
nimesulide
nimodipine
nisoldipine
nitazoxanide
nitisinone
nitrazepam
nitrendipine
nitrofurantoin
nizatidine
norethisterone
norfloxacin
nortriptyline
ofloxacin
olanzapine
olmesartan medoxomil
olsalazine
omeprazole
ondansetron
opipramol
orciprenaline
orlistat
ornidazole
orphenadrine (chloride)
orphenadrine (citrate)
oseltamivir
oxacillin
oxamniquine
oxaprozin
oxatomide
oxazepam
oxcarbazepine
oxprenolol
oxybutynin
oxycodone
oxymetholone
oxyphencyclimine
oxytetracycline
paliperidone
pantoprazole
papaverine
paracetamol
paraldehyde
paramethadione
paramethasone
paricalcitol
paromomycin
paroxetine
pefloxacin
pemoline
penbutolol
penfluridol
penicillamine
pentaerithrityl tetranitrate
pentazocine
pentobarbital
pentoxifylline
pentoxyverine
perazine
pergolide
periciazine
perindopril
perphenazine
pethidine
phenacemide
phenazopyridine
phenelzine
phenformin
phenindione
pheniramine
phenobarbital
phenolphthalein
phenoxybenzamine
phenoxymethylpenicillin
phenprocoumon
phensuximide
phentermine
phentolamine
phenylbutazone
phenylephrine
phenylpropanolamine
phenytoin
phytomenadione
pidotimod
pilocarpine
pimozide
pinacidil
pinaverium
pindolol
pioglitazone
pipamperone
pipemidic acid
piperazine
pipotiazine
piracetam
pirbuterol
pirenzepine
pirfenidone
piribedil
piroxicam
pirprofen
pitavastatin
pivmecillinam
pizotifen
polystyrene sulfonate
polythiazide
posaconazole
potassium citrate
potassium clorazepate
potassium hydrogencarbonate
potassium hydrogentartrate
prajmaline
pramipexole
prasugrel
pravastatin
prazepam
praziquantel
prazosin
prednisolone
prednisone
pregabalin
primaquine
primidone
probenecid
procainamide
procaterol
prochlorperazine
procyclidine
progesterone
proglumide
proguanil
promazine
promethazine
propafenone
propantheline
propicillin
propiomazine
propiverine
propranolol
propylthiouracil
proquazone
protriptyline
prucalopride
prulifloxacin
pseudoephedrine
pyrantel
pyrazinamide
pyridostigmine
pyridoxine (vit b6)
pyrimethamine
pyrvinium
quazepam
quetiapine
quinagolide
quinapril
quinethazone
quinidine
quinine
rabeprazole
raloxifene
raltegravir
ramipril
ranitidine bismuth citrate
ranitidine
ranolazine
rasagiline
reboxetine
remoxipride
repaglinide
reserpine
retigabine
ribavirin
rifabutin
rifampicin
rifaximin
rilpivirine
riluzole
rimonabant
risperidone
ritodrine
ritonavir
rivaroxaban
rivastigmine
rizatriptan
rofecoxib
roflumilast
rokitamycin
ropinirole
rosiglitazone
rosoxacin
rosuvastatin
roxatidine
roxithromycin
rufinamide
rufloxacin
salbutamol
salicylamide
salsalate
saquinavir
saxagliptin
scopolamine
secobarbital
selegiline
sertindole
sertraline
sevelamer
sibutramine
sildenafil
silodosin
simvastatin
sirolimus
sitagliptin
sitaxentan
sodium oxybate
sodium phenylbutyrate
sodium picosulfate
sodium salicylate
solifenacin
sorbitol
sotalol
sparfloxacin
spiramycin
spirapril
spironolactone
stanozolol
stavudine
stiripentol
strontium ranelate
sucralfate
sulfadiazine
sulfafurazole
sulfamethizole
sulfamethoxazole
sulfapyridine
sulfasalazine
sulfinpyrazone
sulindac
sulpiride
sultamicillin
sultopride
sumatriptan
suprofen
tacrine
tacrolimus
tadalafil
talinolol
tamoxifen
tamsulosin
tapentadol
tegaserod
telaprevir
telbivudine
telithromycin
telmisartan
temafloxacin
temazepam
tenofovir disoproxil
tenoxicam
terazosin
terbinafine
terbutaline
terfenadine
terodiline
tertatolol
testosterone
tetrabenazine
tetracycline
thalidomide
theophylline
thiamazole
thiamine (vit b1)
thiamphenicol
thiethylperazine
thioctic acid
thioridazine
tiabendazole
tiagabine
tianeptine
tiapride
tiaprofenic acid
tibolone
ticagrelor
ticlopidine
tilidine
timolol
tinidazole
tiotixene
tipranavir
tizanidine
tocainide
tocofersolan
tocopherol (vit e)
tolazamide
tolazoline
tolbutamide
tolcapone
tolmetin
tolperisone
tolterodine
tolvaptan
topiramate
torasemide
toremifene
tramadol
trandolapril
tranexamic acid
tranylcypromine
trazodone
triamcinolone
triamterene
triazolam
trichlormethiazide
tridihexethyl
trifluoperazine
triflupromazine
triflusal
trihexyphenidyl
trilostane
trimazosin
trimebutine
trimetazidine
trimethadione
trimethoprim
trimipramine
trioxysalen
tripelennamine
triprolidine
troglitazone
troleandomycin
tropisetron
trospium
trovafloxacin
tulobuterol
ulipristal
urapidil
ursodeoxycholic acid
valaciclovir
valdecoxib
valganciclovir
valproic acid
valsartan
vancomycin
vardenafil
varenicline
venlafaxine
verapamil
vigabatrin
vildagliptin
viloxazine
vinpocetine
voriconazole
warfarin
xamoterol
ximelagatran
xipamide
zafirlukast
zalcitabine
zaleplon
zidovudine
zinc acetate
ziprasidone
zofenopril
zolmitriptan
zolpidem
zonisamide
zopiclone
zotepine
zuclopenthixol
ferrous glycine sulfate
ferrous fumarate
ferrous gluconate
ferrous carbonate
ferrous succinate
ferrous tartrate
ferrous aspartate
ferrous ascorbate
ferric sodium citrate
saccharated iron oxide
sodium feredetate
acetylcarnitine
alendronate
amineptine
aniracetam
bamifylline
befunolol
beraprost
bethanidine
bopindolol
calcifediol
capecitabine
carbenicillin
carbocysteine
chenodiol
chlorambucil
chlorphenesin
cholecalciferol
clebopride
clenbuterol
cyclobenzaprine
cyclophosphamide
cysteamine
deserpidine
dexlansoprazole
dexmethylphenidate
diacerein
diacetylmorphine
diazoxide
dofetilide
doxofylline
doxylamine
dronabinol
droxicam
dyclonine
enoximone
estramustine
ethopropazine
etidronate
etizolam
etoposide
etozolin
fendiline
fenquizone
fentiazac
formestane
framycetin
fumagillin
furazolidone
gallopamil
gemifloxacin
glycine
hydroquinidine
hydroxytryptophan
hydroxyurea
iodoquinol
kanamycin
ketazolam
levomethadyl
lomefloxacin
lomustine
lonidamine
lorcainide
meclofenamate
melphalan
mesna
metergoline
methscopolamine
methylene
metyrapone
metyrosine
molsidomine
morniflumate
moxisylyte
nabilone
nefopam
nicergoline
nomegestrol
nystatin
oxandrolone
pazufloxacin
perhexiline
picotamide
pinazepam
piretanide
probucol
procarbazine
progabide
proglumetacin
propyphenazone
racecadotril
reproterol
rifapentine
rilmenidine
rimantadine
secnidazole
seratrodast
sulodexide
tasosartan
tedisamil
tegafur
teicoplanin
tenidap
terguride
tetrazepam
thioguanine
tiopronin
trapidil
tretinoin
triclabendazole
trimethobenzamide
vincamine
voglibose
vorozole
altretamine
aminosalicylic acid
busulfan
deferasirox
ergocalciferol
lapatinib
mercaptopurine
pazopanib
sunitinib
afatinib
axitinib
bosutinib
cabozantinib
crizotinib
dabrafenib
dasatinib
erlotinib
gefitinib
imatinib
nilotinib
regorafenib
ruxolitinib
sorafenib
trametinib
vandetanib
vemurafenib
ibrutinib
ceritinib
amithiozone
azacytidine
benzocaine
bromodiphenhydramine
carbazochrome
cefpodoxime proxetil
cefuroxime axetil
clioquinol
clotiazepam
dehydroepiandrosterone
dexbrompheniramine
dexpanthenol
diatrizoate
ethyl alcohol
fludarabine phosphate
fructose
glisoxepide
glutamine
glycerol
iocetamic acid
iohexol
iopanoic acid
iotrolan
mecamylamine
nalmefene
pantothenic acid
pipobroman
prifinium bromide
alogliptin
alvimopan
azilsartan medoxomil
bedaquiline
bentiromide
canagliflozin
deferiprone
droxidopa
glycerol phenylbutyrate
iloperidone
ivacaftor
lubiprostone
meclofenamic acid
mirabegron
mitotane
ospemifene
perampanel
pomalidomide
ponatinib
risedronate
temozolomide
teriflunomide
tiludronate
cefatrizine
cefditoren
cefetamet
calcium levofolinate
belladonna total alkaloids
citric acid
dapagliflozin
oxytocin
polymyxin b
retinol(vit a)
tafamidis
avanafil
dimethyl fumarate
dolutegravir
enzalutamide
linaclotide
lurasidone
macitentan
palonosetron
sofosbuvir
vortioxetine
bexarotene
buprenorphine
butorphanol
cefamandole
clotrimazole
eszopiclone
fentanyl
idebenone
naloxone
nicotine
ramelteon
rolitetracycline
salicylic acid
tiotropium
topotecan
vitamin b2(riboflavin)
abemaciclib
alectinib
binimetinib
brigatinib
cobimetinib
dacomitinib
encorafenib
everolimus
lenvatinib
lorlatinib
midostaurin
neratinib
nintedanib
osimertinib
palbociclib
ribociclib
acalabrutinib
larotrectinib
gilteritinib
entrectinib
fedratinib
tofacitinib
apremilast
baricitinib
cladribine

## Sheet: Supplementary Table 3
Supplementary Table 2. Drugs for docking.
Name
toremifene
salbutamol
valproic acid
mephenytoin
piperazine
hydroxyzine
dehydroepiandrosterone
cortisone
ketanserin
mepenzolate
hydrochlorothiazide
anastrozole
dapsone
fluvoxamine
nitrofurantoin
moexipril
probucol
bevantolol
guanethidine
melatonin
haloperidol
indometacin
paraldehyde
rizatriptan
apixaban
tibolone
neratinib
liothyronine sodium
brigatinib
alosetron
lofexidine
mazindol
chlorphenesin
protriptyline
sitagliptin
ebastine
modafinil
tolcapone
pinazepam
bromhexine
ferric sodium citrate
isocarboxazid
lactitol
lactulose
oxcarbazepine
penfluridol
zidovudine
flumequine
methotrexate
estazolam
oxacillin
danazol
phenoxymethylpenicillin
pidotimod
quinidine
itraconazole
meclofenamic acid
ramelteon
bromodiphenhydramine
rimonabant
clenbuterol
tridihexethyl
carbimazole
lanthanum carbonate
pioglitazone
tedisamil
tiludronate
ketazolam
triamcinolone
felbamate
triclabendazole
allopurinol
cefamandole
doxycycline
oxyphencyclimine
proglumide
disulfiram
papaverine
diacerein
aciclovir
alectinib
amifampridine
ruxolitinib
valsartan
etilefrine
frovatriptan
betahistine
dextrothyroxine
milnacipran
bromocriptine
propranolol
oxandrolone
nisoldipine
pimozide
cyclophosphamide
mesalazine
sparfloxacin
quinagolide
clotiapine
levamisole
oxamniquine
dutasteride
cyclandelate
abacavir
pantoprazole
trimetazidine
hydrocortisone
clotiazepam
eplerenone
etizolam
methantheline
pramipexole
buclizine
cabergoline
methylphenobarbital
pheniramine
diethylstilbestrol
amithiozone
tapentadol
cisapride
dexpanthenol
escitalopram
etozolin
fosfomycin
amineptine
pentaerithrityl tetranitrate
quetiapine
alitretinoin
fluoxetine
prednisolone
metergoline
ethosuximide
clofazimine
pazufloxacin
azapropazone
lormetazepam
alfuzosin
bedaquiline
binimetinib
nicorandil
ribavirin
prasugrel
temazepam
mianserin
isoxsuprine
dolasetron
phenylbutazone
acetylcarnitine
demeclocycline
phenytoin
propiverine
ornidazole
tasosartan
tiabendazole
pitavastatin
famciclovir
pirfenidone
trimazosin
carbachol
maraviroc
encorafenib
bisoprolol
gliclazide
methysergide
nimesulide
sulfinpyrazone
dantrolene
primaquine
azelastine
diloxanide
megestrol
amobarbital
nabilone
bromperidol
meclofenamate
baricitinib
niflumic acid
cevimeline
sulfadiazine
bexarotene
diazoxide
caffeine
sulodexide
ulipristal
voglibose
fentiazac
dasatinib
proguanil
halofantrine
trospium
pirbuterol
aprobarbital
buphenine
flavoxate
ethyl alcohol
vitamin b2(riboflavin)
chlortetracycline
pirprofen
dextropropoxyphene
iopanoic acid
carglumic acid
phenobarbital
sunitinib
tetracycline
deflazacort
axitinib
nitazoxanide
perindopril
piroxicam
meloxicam
ferrous ascorbate
propyphenazone
clopamide
dacomitinib
ethopropazine
atomoxetine
ramipril
reboxetine
clodronic acid
brodimoprim
aripiprazole
clomipramine
rimantadine
nitisinone
oxybutynin
clofibrate
tamoxifen
troglitazone
ezetimibe
levonorgestrel
magnesium carbonate
dronabinol
chlorpropamide
ambroxol
calcium carbonate
olsalazine
pazopanib
minoxidil
vemurafenib
dinoprostone
ergoloid mesylates
risperidone
nicotinamide
lomefloxacin
chlordiazepoxide
terazosin
suprofen
bethanechol
methoxsalen
telbivudine
tenidap
tramadol
alprenolol
oxazepam
chlorambucil
oxatomide
vorozole
tranexamic acid
tetrazepam
isoetarine
promazine
pentazocine
aniracetam
pinacidil
atovaquone
isopropamide
valganciclovir
indapamide
reproterol
losartan
clonazepam
palbociclib
acitretin
diclofenac
dihydrocodeine
fleroxacin
triflusal
baclofen
penbutolol
ranolazine
fenoterol
salicylamide
fentanyl
diltiazem
glibenclamide
methylprednisolone
zalcitabine
triflupromazine
flunitrazepam
glisoxepide
moclobemide
spironolactone
amiodarone
zolmitriptan
labetalol
nateglinide
etravirine
dicoumarol
nilvadipine
saxagliptin
neomycin
orphenadrine (chloride)
rivastigmine
deferiprone
sofosbuvir
naftidrofuryl
maprotiline
clobazam
nabumetone
pefloxacin
ribociclib
chlorphenamine
pipemidic acid
levothyroxine sodium
ambrisentan
picotamide
cadralazine
ferrous carbonate
riluzole
pemoline
ceftibuten
gatifloxacin
ergotamine
paromomycin
amisulpride
dicycloverine
methadone
cholecalciferol
fesoterodine
tianeptine
chlorhexidine
glutethimide
tolazamide
iocetamic acid
pseudoephedrine
ropinirole
propiomazine
naloxone
cycloserine
cyclizine
phentermine
flunarizine
fluoxymesterone
moxonidine
mefenamic acid
paricalcitol
prifinium bromide
pyrazinamide
tolperisone
manidipine
azacytidine
eslicarbazepine
ferrous fumarate
medroxyprogesterone
terfenadine
bicalutamide
eletriptan
moxifloxacin
eszopiclone
fingolimod
glipizide
cladribine
delavirdine
alclofenac
cromoglicic acid
phentolamine
phenylephrine
terbinafine
diclofenamide
acetophenazine
loprazolam
loratadine
zopiclone
entecavir
benznidazole
benorilate
ergocalciferol
propylthiouracil
dimetindene
pipotiazine
levocetirizine
nelfinavir
sotalol
canagliflozin
buflomedil
darunavir
medazepam
varenicline
phenoxybenzamine
galantamine
cefditoren
quinine
aceclofenac
leflunomide
imipramine
larotrectinib
cyproterone
metyrosine
vandetanib
distigmine
beraprost
lenalidomide
dexbrompheniramine
cimetidine
isradipine
tiopronin
loracarbef
zotepine
ephedrine
ibandronic acid
almitrine
mirabegron
gabapentin
osimertinib
chloramphenicol
bromopride
talinolol
abemaciclib
methenamine
nicotine
chlorothiazide
alfacalcidol
rofecoxib
fluconazole
rabeprazole
naproxen
prulifloxacin
trametinib
erlotinib
mizolastine
desloratadine
biperiden
enoximone
olanzapine
sodium phenylbutyrate
thiethylperazine
moracizine
cefradine
ibrutinib
midodrine
betacarotene
emtricitabine
lorcainide
selegiline
desipramine
diatrizoate
drotaverine
chloral hydrate
citalopram
droxidopa
remoxipride
tadalafil
flucloxacillin
amfetamine
paracetamol
memantine
mitotane
isosorbide mononitrate
flucytosine
morphine
benzatropine
trovafloxacin
diflunisal
acemetacin
midostaurin
dimethyl fumarate
methscopolamine
ascorbic acid (vit c)
trandolapril
auranofin
molsidomine
phenylpropanolamine
dexmethylphenidate
cinacalcet
pregabalin
tretinoin
fampridine
rosuvastatin
palonosetron
ethotoin
bupropion
gilteritinib
cloxacillin
glycine
strontium ranelate
vincamine
melperone
methdilazine
secnidazole
xipamide
bepridil
flurbiprofen
amprenavir
nifedipine
silodosin
simvastatin
dicloxacillin
ajmaline
dofetilide
seratrodast
tacrine
astemizole
gefitinib
ganciclovir
colestipol
hydroquinidine
linagliptin
naratriptan
desvenlafaxine
colestyramine
dihydrotachysterol
perampanel
cefdinir
darifenacin
amezinium metilsulfate
etretinate
pethidine
progesterone
ibopamine
brotizolam
enalapril
busulfan
lisdexamfetamine
prazepam
nefazodone
imidapril
roflumilast
acenocoumarol
amantadine
benzbromarone
tiagabine
fendiline
abiraterone
macitentan
tolterodine
tropisetron
floctafenine
ciprofloxacin
metoclopramide
esomeprazole
clomethiazole
lurasidone
trimethoprim
eprosartan
azatadine
brompheniramine
domperidone
triazolam
bethanidine
lapatinib
ketorolac
buspirone
repaglinide
bosentan
rosoxacin
roxatidine
sumatriptan
bambuterol
tafamidis
phenelzine
thioguanine
irbesartan
pergolide
piretanide
polystyrene sulfonate
gliquidone
telmisartan
cyproheptadine
colchicine
netilmicin
lornoxicam
mycophenolic acid
propicillin
citric acid
carisoprodol
bacampicillin
clindamycin
clonidine
etoricoxib
agomelatine
hyoscyamine
kanamycin
etacrynic acid
loxapine
morniflumate
paroxetine
nebivolol
sibutramine
tenoxicam
triamterene
cyclofenil
mepacrine
meprobamate
topiramate
enzalutamide
calcium folinate
fexofenadine
ketotifen
glucosamine
cefuroxime axetil
mesuximide
encainide
lamivudine
metoprolol
nifurtimox
sodium picosulfate
mesoridazine
benperidol
cefuroxime
gemifloxacin
lisuride
tiapride
melphalan
betamethasone
alvimopan
chlorotrianisene
tegaserod
sitaxentan
oxaprozin
mefloquine
ospemifene
polythiazide
spirapril
enoxacin
phensuximide
meclozine
avanafil
phytomenadione
celecoxib
sulfamethoxazole
deserpidine
phenacemide
atorvastatin
tilidine
flupentixol
acarbose
acalabrutinib
amoxicillin
balsalazide
carbazochrome
natamycin
benazepril
paramethadione
pilocarpine
duloxetine
levocarnitine
tranylcypromine
zaleplon
salicylic acid
hydroxyurea
ibuprofen
mecamylamine
tiotixene
vardenafil
vigabatrin
viloxazine
ondansetron
procyclidine
moxisylyte
methylergometrine
cilazapril
ivabradine
glycopyrronium bromide
ximelagatran
trimebutine
acetohexamide
bosutinib
dibenzepin
theophylline
oxprenolol
periciazine
aprindine
cefadroxil
chlormezanone
amfepramone
cilostazol
procarbazine
trifluoperazine
tocopherol (vit e)
pentoxifylline
cinnarizine
amiloride
ampicillin
lorlatinib
dixyrazine
pyrvinium
sodium feredetate
perphenazine
disopyramide
mifepristone
loperamide
etidronate
carteolol
buprenorphine
rilmenidine
norfloxacin
torasemide
potassium hydrogentartrate
doxazosin
fenquizone
lofepramine
sulfafurazole
entacapone
folic acid
betaxolol
misoprostol
carbocysteine
acetohydroxamic acid
cinoxacin
alprazolam
rolitetracycline
oseltamivir
aminocaproic acid
gemfibrozil
ergometrine
orciprenaline
hydrocodone
solifenacin
halazepam
niclosamide
teriflunomide
betaine
lamotrigine
dexibuprofen
methyltestosterone
griseofulvin
oxymetholone
levetiracetam
alimemazine
rivaroxaban
propafenone
zonisamide
pentobarbital
atenolol
prucalopride
flufenamic acid
linezolid
rufloxacin
ivacaftor
acipimox
probenecid
cefalexin
fludrocortisone
letrozole
oxycodone
promethazine
tamsulosin
diphenhydramine
ferrous succinate
iloperidone
lubiprostone
fusidic acid
tertatolol
pyridostigmine
hydralazine
nevirapine
emepronium
befunolol
brivudine
cefaclor
zofenopril
fedratinib
mibefradil
montelukast
levodopa
pizotifen
exemestane
flecainide
metronidazole
phenazopyridine
trapidil
azathioprine
cefotiam
ketobemidone
lenvatinib
stavudine
macrogol
idebenone
deferasirox
phenformin
retigabine
piribedil
xamoterol
nintedanib
acetazolamide
efavirenz
reserpine
dexamethasone
tolmetin
dyclonine
perazine
quinapril
iohexol
doxepin
cobimetinib
erdosteine
ranitidine
mebendazole
pivmecillinam
prednisone
terodiline
vildagliptin
sorbitol
tetrabenazine
fluphenazine
proquazone
warfarin
ethionamide
ethambutol
triprolidine
captopril
flurazepam
levodropropizine
tolbutamide
zolpidem
artemether
bisacodyl
cysteamine
eltrombopag
meptazinol
pinaverium
sorafenib
midazolam
valdecoxib
cerivastatin
trichlormethiazide
chenodiol
hydroflumethiazide
tofacitinib
clozapine
alizapride
miglustat
nitrazepam
tipranavir
primidone
sulfapyridine
nicardipine
phenindione
acebutolol
bendroflumethiazide
minocycline
miglitol
pravastatin
terguride
diethylcarbamazine
isoprenaline
ponatinib
ciprofibrate
acrivastine
fenbufen
rilpivirine
trimethobenzamide
famotidine
lovastatin
temafloxacin
ketoprofen
tiaprofenic acid
budesonide
fluvastatin
lonidamine
butorphanol
furosemide
glutamine
tocainide
lisinopril
mepyramine
zinc acetate
nalmefene
pipobroman
prochlorperazine
thioctic acid
pyrantel
sulindac
prazosin
propantheline
alendronate
vinpocetine
thiamphenicol
gallopamil
tizanidine
ofloxacin
raloxifene
lercanidipine
lorazepam
stiripentol
ethchlorvynol
dexketoprofen
methaqualone
terbutaline
tolvaptan
pirenzepine
dolutegravir
fenfluramine
metrifonate
chlortalidone
benzocaine
carvedilol
eritrityl tetranitrate
paramethasone
ritodrine
sulfasalazine
butylscopolamine
lincomycin
ticlopidine
metformin
hydromorphone
dienestrol
diazepam
flutamide
testosterone
altretamine
entrectinib
ferrous aspartate
fumagillin
glimepiride
antazoline
methyclothiazide
bentiromide
methyldopa (levorotatory)
omeprazole
trimipramine
tinidazole
ticagrelor
dipyridamole
lacosamide
cyclobenzaprine
verapamil
clobutinol
lomustine
fludarabine phosphate
tiotropium
metacycline
ketoconazole
clomifene
sulpiride
bromazepam
retinol(vit a)
sultamicillin
cabozantinib
formestane
amlodipine
artesunate
cefatrizine
codeine
clebopride
mesna
cetirizine
enprostil
granisetron
trioxysalen
clemastine
perhexiline
chlorprothixene
clotrimazole
chloroquine
cloperastine
trilostane
acetylcysteine
sertraline
mepindolol
diphenoxylate
sodium oxybate
tolazoline
vortioxetine
quazepam
zafirlukast
acamprosate
potassium citrate
nicergoline
penicillamine
potassium clorazepate
chlorphenoxamine
alogliptin
voriconazole
bezafibrate
imatinib
olmesartan medoxomil
guaifenesin
crizotinib
bismuth subcitrate
dextromethorphan
mirtazapine
carbamazepine
febuxostat
nilotinib
flupirtine
levomethadyl
pipamperone
pyrimethamine
grepafloxacin
lansoprazole
saccharated iron oxide
didanosine
pentoxyverine
methylphenidate
naltrexone
dexchlorpheniramine
tripelennamine
dihydroergotamine
dihydralazine
venlafaxine
hexoprenaline
ursodeoxycholic acid
afatinib
calcifediol
fructose
tulobuterol
finasteride
asenapine
iodoquinol
sertindole
sultopride
methocarbamol
adefovir dipivoxil
tegafur
nortriptyline
carbinoxamine
risedronate
aminosalicylic acid
donepezil
cefetamet
pindolol
dosulepin
glycerol
conjugated estrogens
lumiracoxib
etodolac
cefpodoxime proxetil
fenofibrate
levofloxacin
carbenicillin
isoniazid
potassium hydrogencarbonate
apremilast
estradiol
bopindolol
nimodipine
regorafenib
thioridazine
nizatidine
sodium salicylate
glutamic acid hydrochloride
paliperidone
diprophylline
felodipine
indinavir
cyclothiazide
oxytetracycline
trimethadione
melitracen
phenolphthalein
framycetin
racecadotril
temozolomide
fenoprofen
doxylamine
zuclopenthixol
trazodone
levomepromazine
salsalate
chlorpromazine
sulfamethizole
nilutamide
rasagiline
pomalidomide
progabide
prajmaline
molindone
methazolamide
celiprolol
secobarbital
hydroxychloroquine
valaciclovir
praziquantel
calcitriol
thalidomide
dabrafenib
cefprozil
stanozolol
fluocortolone
pantothenic acid
ferrous tartrate
atropine
cefixime
pyridoxine (vit b6)
thiamazole
bazedoxifene
raltegravir
scopolamine
doxofylline
mercaptopurine
nadolol
calcium levofolinate
fosamprenavir
neostigmine
glyceryl trinitrate
lacidipine
amoxapine
levosulpiride
furazolidone
isosorbide dinitrate
isotretinoin
rosiglitazone
nicotinic acid
nomegestrol
almotriptan
chlorzoxazone
guanfacine
norethisterone
quinethazone
dexlansoprazole
dexfenfluramine
phenprocoumon
bamifylline
boceprevir
mexiletine
droxicam
topotecan
acetylsalicylic acid
albendazole
amitriptyline
clioquinol
diacetylmorphine
nefopam
timolol
sildenafil
metamfetamine
mebeverine
metyrapone
aprepitant
piracetam
dexamfetamine
bumetanide
rufinamide
carbenoxolone
ceritinib
opipramol
aminoglutethimide
methyldopa (racemic)
thiamine (vit b1)
capecitabine
delapril
procainamide
azilsartan medoxomil
procaterol
nitrendipine
dapagliflozin
hydroxytryptophan
nalidixic acid
cilnidipine
metolazone
ferrous gluconate
urapidil
trihexyphenidyl
benfluorex
estramustine
etoposide
ziprasidone
clopidogrel

## Sheet: Supplementary Table 4
Supplementary Table 3. Proteins(PDBID) for docking.
Name
4xsj
5fs7
2w8n
3rc3
2jik
2dnw
3r57
1hp8
1jdx
5fs9
4o8z
5kso
2vze
5kvh
4zmg
2x36
4dwn
1ap5
3sz9
2jku
2prl
3t3x
4fzv
4joc
4yik
3jdw
3uij
1xb1
1qnm
4fh0
5g5j
4rr4
1xb0
4xzs
3rig
3gcg
5m3n
4ztu
3rdc
3rci
3t3t
4bur
4ztz
2iwz
4z1h
3ull
4nxw
5ku1
3pl7
4oe5
4da1
1w8d
5jdw
2oat
3rck
5tny
1nut
2w8q
3rd9
4rka
5fs8
6g22
6hc3
3rqs
4jts
5yew
1nus
1hd2
1tw6
3r59
4xgm
9jdw
3v9h
5ol8
5ksp
1ivh
5ola
6g2n
4nxt
5t3v
4job
4jdw
2ht9
3rmu
3rda
4rli
1pl4
4fdh
5to1
2w8r
1nuq
6dl7
1ap6
1jdw
5kty
4jtu
2dud
2wya
3r49
4z1i
3t3j
2jin
5t40
6jdw
2jdw
3pk1
7jdw
2c9h
4nxv
4tx5
5kvi
3t3l
4z1f
5gnu
4kla
2hp8
4kmm
2prm
5ksy
4ls1
8jdw
4ad9
5lv0
4nxx
3r54
1em1
1few
1nur
3b96
3rdb
3spa
4jtt
5m3o
4ls2
1pt9
3v9g
5luz
4yih
1nup
1hkc
5ojo
3r4g
4rk8
4n12
1nuu
4klr
2n3y
3g5p
2k3j
2prh
6avj
3t3k
6ero
4xzv
5kut
3rcl
2pzd
1pc2
6g2m
5ksz
5xgs
3rcf
5fs6
1w73
5ol9
4klc
4nfl
3uih
2w8p
3rcg
4jod
5to0
2jdx
4z1g
2w8o
4xtb
6nyy
1nzn
6bba
4dvq
4l6c
3p1m
1djl
4ls0
6g2l
1efv
3r56

## Sheet: Supplementary Table 5
Supplementary Table 4. The association analysis between different levels of ATC codes and DILI. (***P < 0.001; **P < 0.01; *P < 0.05.)
ATC code	ATC factor	DILI factor		OR (95% CI)	PPR (%)
		Y (n=607)	N (n=616)
First-level
L	Y	89	11	9.45*** (5.00-17.87)	0.89
	N	518	605
M	Y	52	21	2.65*** (1.58-4.46)	0.712329
	N	555	595
J	Y	100	48	2.33*** (1.62-3.36)	0.675676
	N	507	568
N	Y	114	154	0.69** (0.53-0.91)	0.425373
	N	493	462
A	Y	59	107	0.51*** (0.36-0.72)	0.355422
	N	548	509
B	Y	12	27	0.44* (0.22-0.88)	0.307692
	N	595	589
R	Y	20	61	0.31*** (0.18-0.52)	0.246914
	N	587	555
V	Y	2	14	0.14** (0.03-0.63)	0.125
	N	605	602
Second-level
L01	Y	62	4	17.41*** (6.29-48.16)	0.939394
	N	545	612
L04	Y	17	2	8.85*** (2.03-38.45)	0.894737
	N	590	614
J05	Y	35	6	6.22*** (2.60-14.90)	0.853659
	N	572	610
M01	Y	39	10	4.16*** (2.06-8.41)	0.795918
	N	568	606
C08	Y	15	5	3.10* (1.12-8.57)	0.75
	N	592	611
R06	Y	12	27	0.44* (0.22-0.88)	0.307692
	N	595	589
N02	Y	10	26	0.38* (0.18-0.80)	0.277778
	N	597	590
C07	Y	5	18	0.28** (0.10-0.75)	0.217391
	N	602	598
A11	Y	3	13	0.23* (0.07-0.81)	0.1875
	N	604	603
R03	Y	4	18	0.22** (0.07-0.66)	0.181818
	N	603	598
N07	Y	4	23	0.17*** (0.06-0.50)	0.148148
	N	603	593
G02	Y	1	9	0.11* (0.01-0.88)	0.1
	N	606	607
A03	Y	2	24	0.08*** (0.02-0.35)	0.0769231
	N	605	592
R05	Y	1	14	0.07*** (0.01-0.54)	0.0666667
	N	606	602
Third-level
L01X	Y	49	3	17.94*** (5.56-57.89)	0.942308
	N	558	613
L04A	Y	17	2	8.85*** (2.03-38.45)	0.894737
	N	590	614
J05A	Y	35	6	6.22*** (2.60-14.90)	0.853659
	N	572	610
C01B	Y	15	3	5.18** (1.49-17.98)	0.833333
	Y	592	613
M01A	N	37	10	3.93*** (1.94-7.98)	0.787234
	Y	570	606
N06A	N	30	11	2.86** (1.42-5.76)	0.731707
	Y	577	605
R06A	N	12	27	0.44* (0.22-0.88)	0.307692
	Y	595	589
N05C	N	7	22	0.32** (0.13-0.74)	0.241379
	Y	600	594
C07A	Y	5	18	0.28** (0.10-0.75)	0.217391
	N	602	598
N06B	Y	3	12	0.25* (0.07-0.89)	0.2
	N	604	604
N02C	Y	1	10	0.1* (0.01-0.78)	0.0909091
	N	606	606
R03C	Y	1	11	0.09** (0.01-0.71)	0.0833333
	N	606	605
A03A	Y	1	14	0.07*** (0.01-0.54)	0.0666667
	N	606	602
Fourth-level
L01XE	Y	43	1	46.89*** (6.44-341.63)	0.977273
	N	564	615
M01AE	Y	11	1	11.35** (1.46-88.19)	0.916667
	N	596	615
A10BB	Y	9	1	9.26* (1.17-73.28)	0.9
	N	598	615
J05AE	Y	9	2	4.62* (0.99-21.47)	0.818182
	N	598	614
N06AA	Y	12	4	3.09* (0.99-9.62)	0.75
	N	595	612
R03CC	Y	1	9	0.11* (0.01-0.88)	0.1
	N	606	607
P value was calculated by the Fisher’s exact test. Y, positive; N, negative; OR, odds ratio; CI, confidence interval; PR, positive ratio. PR (%) = (drug number of a ATC code with DILI) / (total drug number of a ATC code) *Only shows the ATC codes that have significant associations with DILI.

## Sheet: Supplementary Table 6
Supplementary Table 5. The association analysis between different levels of ATC codes and Severe-DILI. (***P < 0.001; **P < 0.01; *P < 0.05.)
ATC code	ATC factor	Severe DILI		OR (95% CI)	PR (%)
		Y (n=283)	N (n=616)
First-level
L	Y	52	11	12.38*** (6.35-24.14)	0.825397
	N	231	605
M	Y	36	21	4.13*** (2.36-7.22)	0.631579
	N	247	595
J	Y	53	48	2.73*** (1.79-4.15)	0.524752
	N	230	568
N	Y	46	155	0.58** (0.40-0.84)	0.228856
	N	237	461
A	Y	25	107	0.46*** (0.29-0.73)	0.189394
	N	258	509
G	Y	5	34	0.31** (0.12-0.80)	0.128205
	N	278	582
R	Y	5	61	0.16*** (0.07-0.41)	0.0757576
	N	278	555
V	Y	1	14	0.15* (0.02-1.17)	0.0666667
	N	282	602
Second-level
L01	Y	35	4	21.60*** (7.59-61.39)	0.897436
	N	248	612
L04	Y	14	2	15.98*** (3.61-70.79)	0.875
	N	269	614
M04	Y	4	1	8.82* (0.98-79.25)	0.8
	N	279	615
J05	Y	19	6	7.32*** (2.89-18.53)	0.76
	N	264	610
M01	Y	28	10	6.65*** (3.19-13.90)	0.736842
	N	255	606
N05	Y	9	55	0.34** (0.16-0.69)	0.140625
	N	274	561
R03	Y	2	18	0.24* (0.05-1.03)	0.1
	N	281	598
N07	Y	2	23	0.18** (0.04-0.78)	0.08
	N	281	593
C07	Y	1	18	0.12* (0.02-0.89)	0.0526316
	N	282	598
R06	Y	1	27	0.08*** (0.01-0.57)	0.0357143
	N	282	589
Third-level
L01X	Y	28	3	22.44*** (6.76-74.46)	0.903226
	N	255	613
L04A	Y	14	2	15.98*** (3.61-70.79)	0.875
	N	269	614
M04A	Y	4	1	8.82* (0.98-79.25)	0.8
	N	279	615
J05A	Y	19	6	7.32*** (2.89-18.53)	0.76
	N	264	610
C01B	Y	9	3	6.71** (1.80-24.98)	0.75
	N	274	613
M01A	Y	27	10	6.39*** (3.05-13.40)	0.72973
	N	256	606
C09A	Y	8	5	3.55* (1.15-10.97)	0.615385
	N	275	612
N06A	Y	14	11	2.86* (1.28-6.39)	0.56
	N	269	605
N05C	Y	3	22	0.29* (0.09-0.97)	0.12
	N	280	594
N05A	Y	2	23	0.18** (0.04-0.78)	0.08
	N	281	593
C07A	Y	1	18	0.12* (0.02-0.89)	0.0526316
	N	282	598
R06A	Y	1	27	0.08*** (0.01-0.57)	0.0357143
	N	282	589
Fourth-level
L01XE	Y	26	1	62.21*** (8.40-460.94)	0.962963
	N	257	615
M01AE	Y	9	1	20.20*** (2.55-160.23)	0.9
	N	274	615
N06AB	Y	4	1	8.82* (0.98-79.25)	0.8
	N	279	615
L04AA	Y	7	2	7.79** (1.61-37.72)	0.777778
	N	276	614
M01AB	Y	6	3	4.43* (1.10-17.83)	0.666667
	N	277	613
C09AA	Y	8	5	3.55* (1.15-10.97)	0.615385
	N	275	611
P value was calculated by the Fisher’s exact test. Y, positive; N, negative; OR, odds ratio; CI, confidence interval; PR, positive ratio. PR (%) = (drug number of a ATC code with Severe DILI) / (total drug number of a ATC code) *Only shows the ATC codes that have significant associations with Severe DILI.

## Sheet: Supplementary Table 7
Supplementary Table 7. Validation of drugs involved in cases evaluated by RUCAM.
Number	Drug	Severe_label	Reference
1	Proguanil	1	[1]
2	Amoxicillin	1	[1]
3	Flucloxacillin	1	[1]
4	Sofosbuvir	1	[1]
5	Nitrofurantoin	2	[1]
6	Ximelagatran	1	[1]
7	Atomoxetine	2	[1]
8	Etravirine	2	[1]
9	Bosentan	2	[1]
10	Rivaroxaban	1	[1]
11	Bupropion	1	[1]
12	Ciprofloxacin	2	[1]
13	Everolimus	2	[1]
14	Everolimus	2	[1]
15	Memantine	2	[1]
16	Haloperidol	1	[1]
17	Amiodarone	2	[1]
18	Nevirapine	2	[1]
19	Clonazepam	1	[1]
20	Valsartan	2	[1]
21	Albendazole	1	[1]
22	Methylphenidate	2	[1]
23	Nimesulide	2	[1]
24	Anastrozole	1	[1]
25	Crizotinib	2	[1]
26	Pioglitazone	2	[1]
27	Fenofibrate	1	[1]
28	Posaconazole	2	[1]
29	Dolutegravir	2	[1]
30	Rofecoxib	2	[1]
31	Atorvastatin	2	[1]
32	Methotrexate	2	[1]
33	Diclofenac	2	[1]
34	Etodolac	2	[1]
35	Montelukast	1	[1]
36	Carbamazepine	2	[2]
37	Ibuprofen	2	[2]
38	Phenytoin	2	[2]
39	Thiamazole	1	[2]
40	Cyproterone	2	[3]
41	Isoniazid	2	[4]
42	Ketoconazole	2	[4]
43	rifampicin	2	[4]
44	Trimethoprim	1	[4]
45	sulfamethoxazole	2	[4]
46	Terbinafine	2	[4]
47	Itraconazole	2	[4]
48	Azithromycin	2	[4]
49	Telithromycin	2	[4]
50	Valproic acid	2	[4]
51	Vigabatrin	2	[5]
52	Topiramate	2	[5]
53	Pregabalin	1	[5]
54	Oxcarbazepine	1	[5]
55	Lorazepam	1	[5]
56	Levetiracetam	2	[5]
57	Gabapentin	1	[5]
58	Felbamate	2	[5]
59	Diazepam	2	[5]
60	Lamotrigine	2	[5]
61	Clozapine	1	[6]
62	Pyrazinamide	2	[6]
63	Sulfasalazine	2	[6]
64	Flutamide	2	[6]
65	Imatinib	2	[6]
66	Enalapril	2	[6]
67	clofazimine	1	[6]
68	Propylthiouracil	2	[6]
69	erythromycin	2	[7]
70	minocycline	2	[8]
71	sulindac	2	[8]
72	tamoxifen	2	[8]
73	Thalidomide	2	[9]
74	Acarbose	2	[9]
75	Gliclazide	2	[9]
76	Metformin	1	[9]
77	Celecoxib	2	[9]
78	Meloxicam	2	[9]
79	Phenylbutazone	2	[9]
80	Olanzapine	1	[9]
81	Etoposide	2	[9]
82	norfloxacin	2	[10]
83	roxithromycin	2	[10]
84	ethambutol	1	[11]
85	Progesterone	2	[12]
86	Tenoxicam	1	[12]
87	Carbimazole	2	[12]
88	ribavirin	2	[12]
89	Tramadol	1	[12]
90	Isotretinoin	1	[13]
91	Azathioprine	2	[13]
92	Allopurinol	2	[14]
93	Auranofin	1	[14]
94	Efavirenz	2	[14]
95	Mercaptopurine	2	[14]
96	Quinidine	2	[14]
97	Thioguanine	1	[14]
98	Ticlopidine	2	[14]
99	Simvastatin	2	[14]
100	Busulfan	2	[14]
101	Chlorpromazine	1	[14]
102	Didanosine	2	[14]
103	Disulfiram	2	[14]
104	Dantrolene	2	[14]
105	Hydralazine	2	[14]
106	paracetamol	2	[15]
107	Glipizide	1	[15]
108	Dapsone	1	[15]
109	Leflunomide	2	[15]
110	Cefaclor	1	[16]
111	Cefixime	1	[16]
112	Ceftibuten	1	[16]
113	Clarithromycin	2	[16]
114	Nefazodone	2	[17]
115	Methyldopa (levorotatory)	2	[17]
116	Metronidazole	1	[17]
117	Voriconazole	2	[17]
118	Colchicine	1	[17]
119	Naproxen	2	[17]
120	Risperidone	1	[17]
121	Fluoxetine	2	[17]
122	Prednisolone	2	[17]
123	Oxymetholone	2	[17]
124	Amlodipine	1	[17]
125	Trovafloxacin	2	[18]
126	Paroxetine	2	[18]						[1] Teschke R, Danan G. Worldwide Use of RUCAM for Causality Assessment in 81,856 Idiosyncratic DILI and 14,029 HILI Cases Published 1993-Mid 2020: A Comprehensive Analysis. Medicines (Basel). 2020 Sep 29;7(10):62. doi: 10.3390/medicines7100062. PMID: 33003400; PMCID: PMC7600114.
127	Fluvastatin	2	[19]						[2] Bessone F, Hernandez N, Lucena MI, Andrade RJ; Latin Dili Network Latindilin And Spanish Dili Registry. The Latin American DILI Registry Experience: A Successful Ongoing Collaborative Strategic Initiative. Int J Mol Sci. 2016 Feb 29;17(3):313. doi: 10.3390/ijms17030313. PMID: 26938524; PMCID: PMC4813176.
128	Moxifloxacin	2	[19]						[3] Bessone F, Hernandez N, Mendizabal M, Sanchez A, Paraná R, Arrese M, Tagle M, Girala M, Lizarzabal M, Carrera E, Brahm J, Contreras F, Mendez-Sanchez N, Santos G, Nunes V, Medina-Caliz I, Parra-Martinez C, Sanz-Villanueva L, Isabel Lucena M, Andrade RJ. When the Creation of a Consortium Provides Useful Answers: Experience of The Latin American DILI Network (LATINDILIN). Clin Liver Dis (Hoboke…
129	Propafenone	2	[19]						[4] Colaci CS, Mendizabal M, Bessone F. Idiosyncratic Drug-Induced Acute Liver Failure: A Challenging and Distressing Scenario. Curr Drug Saf. 2019;14(2):94-101. doi: 10.2174/1574886314666190215115434. PMID: 30767751.
130	Omeprazole	2	[19]						[5] Sridharan K, Daylami AA, Ajjawi R, Ajooz HAMA. Drug-Induced Liver Injury in Critically Ill Children Taking Antiepileptic Drugs: A Retrospective Study. Curr Ther Res Clin Exp. 2020 Mar 9;92:100580. doi: 10.1016/j.curtheres.2020.100580. PMID: 32280391; PMCID: PMC7138958.
131	Ezetimibe	1	[19]						[6] Becker MW, Lunardelli MJM, Tovo CV, Blatt CR. Drug and herb-induced liver injury: A critical review of Brazilian cases with proposals for the improvement of causality assessment using RUCAM. Ann Hepatol. 2019 Sep-Oct;18(5):742-750. doi: 10.1016/j.aohep.2019.03.010. Epub 2019 May 12. PMID: 31130470.
132	Clopidogrel	2	[20]						[7] Hou FQ, Zeng Z, Wang GQ. Hospital admissions for drug-induced liver injury: clinical features, therapy, and outcomes. Cell Biochem Biophys. 2012 Nov;64(2):77-83. doi: 10.1007/s12013-012-9373-y. PMID: 22806342.
133	Gemfibrozil	1	[20]						[8] Hao K, Yu Y, He C, Wang M, Wang S, Li X. [RUCAM scale-based diagnosis, clinical features and prognosis of 140 cases of drug-induced liver injury]. Zhonghua Gan Zang Bing Za Zhi. 2014 Dec;22(12):938-41. Chinese. doi: 10.3760/cma.j.issn.1007-3418.2014.12.012. PMID: 25654289.
134	Ranitidine	2	[20]						[9] Ou P, Chen Y, Li B, Zhang M, Liu X, Li F, Li Y, Chen C, Mao Y, Chen J. Causes, clinical features and outcomes of drug-induced liver injury in hospitalized patients in a Chinese tertiary care hospital. Springerplus. 2015 Dec 22;4:802. doi: 10.1186/s40064-015-1600-8. PMID: 26702391; PMCID: PMC4688287.
135	Mianserin	1	[21]						[10] Zhu Y, Li YG, Wang JB, Liu SH, Wang LF, Zhao YL, Bai YF, Wang ZX, Li JY, Xiao XH. Causes, Features, and Outcomes of Drug-Induced Liver Injury in 69 Children from China. Gut Liver. 2015 Jul;9(4):525-33. doi: 10.5009/gnl14184. PMID: 25717050; PMCID: PMC4477997.
136	Clomipramine	1	[21]						[11] Tao B, Chen S, Lin G, et al. Genetic polymorphisms of UGT1A1 and susceptibility to anti-tuberculosis drug-induced liver: A RUCAM-based case–control study[J]. International Journal of Immunopathology and Pharmacology, 2018, 32: 2058738418816288.
137	Cimetidine	2	[21]						[12] Alhaddad O, Elsabaawy M, Abdelsameea E, Abdallah A, Shabaan A, Ehsan N, Elrefaey A, Elsabaawy D, Salama M. Presentations, Causes and Outcomes of Drug-Induced Liver Injury in Egypt. Sci Rep. 2020 Mar 20;10(1):5124. doi: 10.1038/s41598-020-61872-9. PMID: 32198411; PMCID: PMC7083870.
138	Clindamycin	1	[22]						[13] Björnsson ES, Bergmann OM, Björnsson HK, Kvaran RB, Olafsson S. Incidence, presentation, and outcomes in patients with drug-induced liver injury in the general population of Iceland. Gastroenterology. 2013 Jun;144(7):1419-25, 1425.e1-3; quiz e19-20. doi: 10.1053/j.gastro.2013.02.006. Epub 2013 Feb 16. PMID: 23419359.
139	Papaverine	1	[23]						[14] Björnsson ES, Hoofnagle JH. Categorization of drugs implicated in causing liver injury: Critical assessment based on published case reports. Hepatology. 2016 Feb;63(2):590-603. doi: 10.1002/hep.28323. Epub 2015 Dec 21. PMID: 26517184.
140	Ramipril	2	[23]						[15] Devarbhavi H, Dierkhising R, Kremers WK, Sandeep MS, Karanth D, Adarsh CK. Single-center experience with drug-induced liver injury from India: causes, outcome, prognosis, and predictors of mortality. Am J Gastroenterol. 2010 Nov;105(11):2396-404. doi: 10.1038/ajg.2010.287. Epub 2010 Jul 20. PMID: 20648003.
141	Levofloxacin	2	[24]						[16] Ferrajolo C, Verhamme KM, Trifirò G, 't Jong GW, Picelli G, Giaquinto C, Mazzaglia G, Stricker BH, Rossi F, Capuano A, Sturkenboom MC. Antibiotic-Induced Liver Injury in Paediatric Outpatients: A Case-Control Study in Primary Care Databases. Drug Saf. 2017 Apr;40(4):305-315. doi: 10.1007/s40264-016-0493-y. PMID: 28025733; PMCID: PMC5362651.
142	Duloxetine	2	[24]						[17]Costa-Moreira P, Gaspar R, Pereira P, Lopes S, Canão P, Lopes J, Carneiro F, Macedo G. Role of liver biopsy in the era of clinical prediction scores for "drug-induced liver injury" (DILI): experience of a tertiary referral hospital. Virchows Arch. 2020 Oct;477(4):517-525. doi: 10.1007/s00428-020-02824-6. Epub 2020 May 6. PMID: 32377873.
143	SERTRALINE	2	[25]						[18] Andrade RJ, Lucena MI, Fernández MC, Pelaez G, Pachkoria K, García-Ruiz E, García-Muñoz B, González-Grande R, Pizarro A, Durán JA, Jiménez M, Rodrigo L, Romero-Gomez M, Navarro JM, Planas R, Costa J, Borras A, Soler A, Salmerón J, Martin-Vivaldi R; Spanish Group for the Study of Drug-Induced Liver Disease. Drug-induced liver injury: an analysis of 461 incidences submitted to the Spanish regi…
144	Pravastatin	2	[26]						[19] Lucena MI, Kaplowitz N, Hallal H, Castiella A, García-Bengoechea M, Otazua P, Berenguer M, Fernandez MC, Planas R, Andrade RJ. Recurrent drug-induced liver injury (DILI) with different drugs in the Spanish Registry: the dilemma of the relationship to autoimmune hepatitis. J Hepatol. 2011 Oct;55(4):820-7. doi: 10.1016/j.jhep.2010.12.041. Epub 2011 Feb 19. PMID: 21338638.
145	Oxacillin	1	[26]						[20] Medina-Caliz I, Robles-Diaz M, Garcia-Muñoz B, Stephens C, Ortega-Alonso A, Garcia-Cortes M, González-Jimenez A, Sanabria-Cabrera JA, Moreno I, Fernandez MC, Romero-Gomez M, Navarro JM, Barriocanal AM, Montane E, Hallal H, Blanco S, Soriano G, Roman EM, Gómez-Dominguez E, Castiella A, Zapata EM, Jimenez-Perez M, Moreno JM, Aldea-Perona A, Hernández-Guerra M, Prieto M, Zoubek ME, Kaplowitz N,…
146	Rosuvastatin	2	[26]						[21] Björnsson E, Olsson R. Outcome and prognostic markers in severe drug-induced liver disease. Hepatology. 2005 Aug;42(2):481-9. doi: 10.1002/hep.20800. PMID: 16025496.
147	Lisinopril	2	[26]						[22] De Valle MB, Av Klinteberg V, Alem N, Olsson R, Björnsson E. Drug-induced liver injury in a Swedish University hospital out-patient hepatology clinic. Aliment Pharmacol Ther. 2006 Oct 15;24(8):1187-95. doi: 10.1111/j.1365-2036.2006.03117.x. PMID: 17014577.
148	Nicotinic Acid	2	[26]						[23] Björnsson E, Kalaitzakis E, Av Klinteberg V, Alem N, Olsson R. Long-term follow-up of patients with mild to moderate drug-induced liver injury. Aliment Pharmacol Ther. 2007 Jul 1;26(1):79-85. doi: 10.1111/j.1365-2036.2007.03355.x. PMID: 17555424.
149	Piroxicam	2	[26]						[24] Cheetham TC, Lee J, Hunt CM, Niu F, Reisinger S, Murray R, Powell G, Papay J. An automated causality assessment algorithm to detect drug-induced liver injury in electronic medical record data. Pharmacoepidemiol Drug Saf. 2014 Jun;23(6):601-8. doi: 10.1002/pds.3531. Epub 2013 Oct 21. PMID: 24920207.
150	Phenobarbital	1	[27]						[25] Nicoletti P, Aithal GP, Bjornsson ES, Andrade RJ, Sawle A, Arrese M, Barnhart HX, Bondon-Guitton E, Hayashi PH, Bessone F, Carvajal A, Cascorbi I, Cirulli ET, Chalasani N, Conforti A, Coulthard SA, Daly MJ, Day CP, Dillon JF, Fontana RJ, Grove JI, Hallberg P, Hernández N, Ibáñez L, Kullak-Ublick GA, Laitinen T, Larrey D, Lucena MI, Maitland-van der Zee AH, Martin JH, Molokhia M, Pirmohamed M…
151	Ciclosporin	2	[27]						[26] Cirulli ET, Nicoletti P, Abramson K, Andrade RJ, Bjornsson ES, Chalasani N, Fontana RJ, Hallberg P, Li YJ, Lucena MI, Long N, Molokhia M, Nelson MR, Odin JA, Pirmohamed M, Rafnar T, Serrano J, Stefánsson K, Stolz A, Daly AK, Aithal GP, Watkins PB; Drug-Induced Liver Injury Network (DILIN) investigators; International DILI consortium (iDILIC). A Missense Variant in PTPN22 is a Risk Factor for…
152	Valaciclovir	1	[27]						[27] Ou P, Chen Y, Li B, Zhang M, Liu X, Li F, Li Y, Chen C, Mao Y, Chen J. Causes, clinical features and outcomes of drug-induced liver injury in hospitalized patients in a Chinese tertiary care hospital. Springerplus. 2015 Dec 22;4:802. doi: 10.1186/s40064-015-1600-8. PMID: 26702391; PMCID: PMC4688287.
153	Amitriptyline	2	[28]						[28] Zhu Y, Li YG, Wang JB, Liu SH, Wang LF, Zhao YL, Bai YF, Wang ZX, Li JY, Xiao XH. Causes, Features, and Outcomes of Drug-Induced Liver Injury in 69 Children from China. Gut Liver. 2015 Jul;9(4):525-33. doi: 10.5009/gnl14184. PMID: 25717050; PMCID: PMC4477997.
154	Mesalazine	2	[28]
		1-"Less severe DILI" 2-"Severe DILI"
